# Supplementary material for: Targeting 160 Candidate Genes for Blood Pressure Regulation with a Genome-Wide Genotyping Array
Source: PLoS One. 2009 Jun 29;4(6):e6034. doi: 10.1371/journal.pone.0006034 (PMC2699027; doi:10.1371/journal.pone.0006034)
Supplement: Table S2 — List of candidate regions with no significant associations. aCoordinates include genic region ±10 kb. Coordinates refer to human genome build 35; b% of SNPs (MAF≥0.05) in Hapmap phase II (CEU population) localized in genic regions that were tagged on the Affymetrix 500 k chip with r2≥0.8. The analysis included SNPs on the Affimetrix array within ±200 kb from a gene and passing quality control criteria in the KORA 500K genotyping. (0.09 MB XLS) [file pone.0006034.s002.xls]

## Sheet: Sheet1
Supporting information, Table S2. List of candidate regions with no significant associations. a - Coordinates include genic region ± 10 kb. Coordinates refer to human genome build 35; b - % of SNPs (MAF ≥ 0.05) in Hapmap phase II (CEU population) localized in genic regions that were tagged on the Affymetrix 500k chip with r2 ≥ 0.8. The analysis included SNPs on the Affimetrix array within ±200 kb…
symbol	Locuslink ID	name	function		locus	starta	enda	lengtha	Affymetrix 500k SNPs	SNPs/Kb	avgerage distance between SNPs	HAPMAP coverageb
ACE	1636	angiotensin I converting enzyme (peptidyl-dipeptidase A) 1	Converts angiotensin I to angiotensin II by release of the terminal HIS-LEU, this results in an increase of the vasoconstrictor activity of angiotensin. Also able to inactivate bradykinin, a potent vasodilatator.	Susceptibility to myocardial infarction.	17q23	58898166	58938711	40545	7	0.172648	5792.14	0.764706
ACSM3	6296	SA (rat hypertension-associated) homolog	Medium-chain fatty acid:CoA ligase activity with broad substrate specificity (in vitro). Acts on acids from C(4) to C(11) and on the corresponding 3-hydroxy- and 2,3- or 3,4- unsaturated acids (in vitro)	Hypertension, essential	16p13.11	20672813	20725979	53166	9	0.169281	5907.33	0.904762
ADD1	118	adducin 1 (aplha)	Membrane-cytoskeleton-associated protein that promotes the assembly of the spectrin-actin network. Binds to calmodulin.	Essential salt-sensitive hypertension; hyperlipidemia familial combined, huntington disease, stroke, renal disease, insulin resistance, coronary heart disease	4p16.3	2872590	2978794	106204	22	0.207149	4827.45	0.916667
ADD2	119	adducin 2 (beta)	Membrane-cytoskeleton-associated protein that promotes the assembly of the spectrin-actin network. Binds to calmodulin. Calmodulin binds preferentailly to the beta subunit.	Essential salt-sensitive hypertension; hereditary elliptocytosis and spherocytosis, hemolysis, anemia.	2p14-p13	70790918	70916984	126066	39	0.309362	3232.46	0.865169
ADD3	120	adducin 3 (gamma)	Membrane-cytoskeleton-associated protein that promotes the assembly of the spectrin-actin network.	Essential salt-sensitive hypertension.	10q24.2-q24.3	111747701	111895310	147609	11	0.0745212	13419	0.866667
ADM/AM	133	adrenomedullin	AM and PAMP are potent hypotensive and vasodilatator agents. Numerous actions have been reported most related to the physiologic control of fluid and electrolyte homeostasis. In the kidney, am is diuretic and natriuretic, and both am and pamp inhibit aldosterone secretion by direct adrenal actions.	Essential hypertension; heart failure; chronic hypotension; hypertension pulmonary.	11p15.4	10273218	10295499	22281	1	0.0448813	22281	0
ADORA1	134	adenosine A1 receptor	Receptor for adenosine. The activity of this receptor is mediated by G proteins which inhibit adenylyl cyclase.	Ischemia; myocardial ischemia; heart failure congestive; cardiovascular diseases; hypotension.	1q32.1	199818493	199878190	59697	12	0.201015	4974.75	0.625
ADORA2A	135	adrenergic, beta-2-, receptor, surface	Receptor for adenosine. The activity of this receptor is mediated by G proteins which activate adenylyl cyclase.	Essential hypertension; stroke; parkinson disease; huntington disease; coronary artery disease; coronary artery disease.	22q11.2	23143646	23172878	29232	7	0.239464	4176	0.571429
ADRA1A	148	adrenergic, alpha-1A-, receptor	This alpha-adrenergic receptor mediates its action by association with G proteins that activate a phosphatidylinositol- calcium second messenger system. Its effect is mediated by G(q) and G(11) proteins.	Prostatic hyperplasia; attention-deficit hyperactivity disorder.	8p21-p11.2	26651584	26788839	137255	25	0.182143	5490.2	0.455882
ADRB3	155	Adrenergic, beta-3-, receptor	Beta-adrenergic receptors mediate the catecholamine- induced activation of adenylate cyclase through the action of G proteins. Beta-3 is involved in the regulation of lipolysis and thermogenesis	Excess capacity to gain weight in patients with insulin resistance, early onset non insulin dependent diabetes and/or morbid obesity, with fatty liver	8p12-p11.2	37929673	37953341	23668	0	0	NA	0
AGT	183	angiotensinogen preproprotein	In response to lowered blood pressure, the enxyme renin cleaves angiotensin I, from angiotensinogen. ACE (angiotensin converting enzyme) then removes a dipeptide to yield the physiologically active peptide peptide angiotensin II, the most potent pressor substance known, which helps regulate volume and mineral balance of body fluids.	Hypertension, essential, susceptibility to; pregnancy-induced hypertension (PIH) (Preeclampsia)	1q42-q43	227135006	227166676	31670	14	0.442059	2262.14	0.4375
AGTR1	185	Angiotensin-II type 1 receptor	Receptor for angiotensin II. Mediates its action by association with G proteins that activate a phosphatidylinositol - calcium second messenger system.	Hypertension, essential; renal disease, heart failure; cardiovascular diseases; nephropathy obstructive	3q21-q25	149888356	149953489	65133	33	0.506656	1973.73	0.482759
AGTR2	186	Angiotensin receptor 2	Receptor for angiotensin II. May have role in cell morphogenesis and related events in growth and development.	Hypertension, essential; renal disease, heart failure; cardiovascular diseases; nephropathy obstructive	Xq22-23	115103885	115127701	23816	1	0.0419886	23816	0
AKR1B1	231	aldo-keto reductase family 1, member B1 (aldose reductase)	Catalyzes the NADPH-dependent reduction of a wide variety of carbonyl-containing compounds to their corresponding alcohols with a broad range of catalytic efficiencies.	Atherosclerosis; myocardial infarction; stroke; coronary artery disease; renal disease.	7q35	133574362	133611143	36781	7	0.190316	5254.43	0.5
APOA1	335	Apolipoprotein A-1	APOA-1 participates on the reverse transport of choloesterol from tissues to the liver for excretion by promoting cholesterol efflux from tissues and by acting as a cofactor for the lecithin cholesterol acyltransferase (LCAT).	Atherosclerosis; coronary heart disease; coronary artery disease; hypercholesterolemia	11q23-q24	116201679	116223548	21869	6	0.274361	3644.83	0
APOA2	336	Apolipoprotein A-II	May stabilize HDL (high density lipoprotein) structure by its association with lipids, and affect the HDL metabolism.	Apolipoprotein A-II deficiency; atherosclerosis; coronary heart disease; coronary artery disease; hypercholesterolemia	1q21-q23	157995156	158016491	21335	5	0.234357	4267	0.5
APOC2	344	Apolipoprotein C-II	APOC-II is a component of the very low density lipoprotein (VLDL) fraction in plasma, and is and activator of several triacylgycerol lipases. The association of APOC-II with plasma chylomicrons, VLDL, and HDL is reversible, a function of the secretion and catabolism of triglyceride-rich lipoproteins, and changes rapidly.	Hyperlipoproteinemia, type Ib	19q13.2	50131083	50154657	23574	2	0.0848392	11787	0.5
APOC3	345	Apolipoprotein C-III	APOC-III inhibits lipoprotein lipase and hepatic lipase and decreases the uptake of lymph chylomicrons by hepatic cells. This suggests that APOC-III delays catabolism of triglyceride-rich particles.	Hyperlipoproteinemia	11q23.1-q23.2	116195834	116218997	23163	6	0.259034	3860.5	0
APOC4	346	Apolipoprotein C-IV	May participate in lipoprotein metabolism.	Coronary artery disease	19q13.2	50127335	50150591	23256	1	0.0429997	23256	0
APOE	348	Apolipoprotein E	Mediates the binding, internalization, and catabolism of lipoprotein particles. It can serve as a ligand for the LDL (apo B/E) receptor and for the specific apo-E receptor (chylomicron remnant) of hepatic tissues.	Early-onset coronary heart disease; multiple sclerosis; myocardial infarction; hyperlipoproteinemia type III; atherosclerosis.	19q13.2	50090879	50114489	23610	1	0.0423549	23610	0
ATP1A1	476	ATPase, Na+K+ transporting, alpha-1 polypeptide	This is the catalytic component of the active enzyme , which catalyzes the hydrolysis of ATP coupled with the exange of Na and K ions across theplasma membrane. This action creates the electrochemical gradient of Na and K, providing the energy for active transport of various nutrients.	Hypertension	1p13-11	116617878	116669436	51558	17	0.329726	3032.82	0
AVP	551	arginine vasopressin (neurophysin II, antidiuretic hormone, diabetes insipidus, neurohypophyseal)	Vasopressin has a direct antidiuretic action on the kidney, it also causes vasoconstriction of the peripheral vessels.	Neurohypophyseal diabetes insipidus; heart failure;	20p13	3001203	3023370	22167	0	0	NA	0
AVPR1A	552	arginine vasopressin receptor 1A	Receptor for arginine vasopressin. The activity of this receptor is mediated by G proteins which activate a phosphatidyl- inositol-calcium second messenger system. Has been involved in social behaviors, including affiliation and attachment.	Ischemia; dysmenorrhea	12q14-q15	61816483	61842857	26374	5	0.189581	5274.8	0.8
AVPR1B	553	arginine vasopressin receptor 1B	Receptor for arginine vasopressin. The activity of this receptor is mediated by G proteins which activate a phosphatidyl- inositol-calcium second messenger system. Has been involved in social behaviors, including affiliation and attachment.	Major depression; tumors	1q32	202757011	202784698	27687	0	0	NA	0
AVPR2	554	Arginine vasopressin receptor 2 (nephrogenic diabetes insipidus)	Receptor for arginine vasopressin. The activity of this receptor is mediated by G proteins which activate adenylate cyclase.	Diabetes insipidus, nephrogenic	Xq28	152681217	152703486	22269	1	0.0449055	22269	0
BRS3	680	Bombesin-like receptor 3	Role in sperm cell division, maturation, or function. This receptor mediated its action by association with G proteins that activate phosphatidylinositol-calcium second messenger system.	Obesity; tumors; nsclc	Xq26-q28	135285645	135310118	24473	1	0.0408614	24473	1
BSND	7809	Barttin	Functions as a beta-subunit for CLCNKA and CLCNKB chloride channels. In the kidney CLCNK/BSND heteromers mediate chloride reabsorption by facilitating its basolateral efflux. In the stria, CLCNK/BSND channels drive potassium secretion by recycling chloride for the basolateral SLC12A2 cotransporter	Bartter syndrome; gitelman syndrome; hypokalemia, hypotension: renal failure	11p32.1	55166638	55196485	29847	7	0.234529	4263.86	0.75
CACNA1C	775	calcium channel, voltage-dependent, L type,	Voltage-sensitive calcium channels (VSCC) mediate the entry of calcium ions into excitable cells and are also involved in a variety of calcium-dependent processes, including muscle contraction, hormone or neurotransmitter release, gene expression, cell motility, cell division and cell death.	Hypokalemic periodic paralysis	12p13.3	2022725	2687376	664651	168	0.252764	3956.26	0.624348
CALCA	796	Calcitonin/calcitonin-related polypeptide, alpha	Calcitonin causes a rapid but short-lived drop in the level of calcium and phosphate in blood by promoting the incorporation of those ions in the bones.	Ostepoprosis	11p15.2-p15.1	14934792	14960408	25616	5	0.195191	5123.2	1
CLCNKA	1187	Chloride channel, kidney, A	Voltage-gated chloride channel. Chloride channels have several functions including the regulation of cell volume; membrane potential stabilization, signal transduction and transepithelial transport. May be important in urinary concentrating mechanisms.	Bartter syndrome, type 4, digenic	1p36	16083792	16115850	32058	3	0.0935804	10686	0.545455
CLCNKB	1188	Chloride channel, kidney, B	Voltage-gated chloride channel. Chloride channels have several functions including the regulation of cell volume; membrane potential stabilization, signal transduction and transepithelial transport. May be important in urinary concentrating mechanisms.	Bartter syndrome, antenatal	1p36	16105658	16138782	33124	2	0.0603792	16562	0.285714
CMA1	1215	chymas 1, mast cell	Major secreted protease of mast cells with suspected roles in vasoactive peptide generation, extracellular matrix degradation, and regulation of gland secretion.	Inflammation; vascular disease; heart failure; dermatitis atopic	14q11.2	24034552	24057311	22759	5	0.219693	4551.8	0.4
CYP11B1	1584	Cytochrome P450, subfamily XIB, polypeptide 1 (11-beta-hydroxylase; corticosteroid methyl-oxidase II (CMO II))	Has steroid 11-beta-hydroxylase activity. In addition to this activity, the 18 or 19-hydroxylation of steroids and the aromatization of androstendione to estrone have also been ascribed to cytochrome P450 XIB.	Adrenal hyperplasia, congenital, due to 11-beta-hydroxylasedeficiency (3); Aldosteronism, glucocorticoid-remediable	8q21	143940777	143968238	27461	5	0.182076	5492.2	1
CYP11B2	1585	Cytochrome P450, subfamily XIB, polypeptide 2	Preferentially catalyzes the conversion of 11-deoxycorticosterone to aldosterone via corticosterone and 18-hydroxycorticosterone.	Hypoaldosteronism, congenital, due to CMO II deficiency (3);Hypoaldosteronism, congenital, due to CMO I deficiency, 203400 (3); {Low renin hypertension, susceptibility to} (3); Aldosterone to renin ratioraised (3)	8q21-q22	143978977	144006261	27284	5	0.183258	5456.8	0.8
CYP17A1	1586	Cytochrome P450, family 17, subfamily A, polypeptide 1 (steroid 17-alpha-hydroxylase)	Conversion of pregnenolone and progesterone to their 17-alpha-hydoxylated products and seubsequently to dehydroepiandrosterone (DHEA) and androstenedione. Catalyzes both the 17-alpha-hydroxylation and the 17, 20-lyase reaction. Involved in sexual development during fetal life and at buberty.	Adrenal hyperplasia, congenital, due to 17-alpha-hydroxylasedeficiency (3)	10q24.3	104570280	104597280	27000	6	0.222222	4500	0.75
CYP4A11	1579	cytochrome P450, family 4, subfamily A, polypeptide 11	Catalyzes the omega- and (omega-1)-hydroxylation of various fatty acids such as laurate, myristate and palmitate. Has little activity toward prostaglandins A1 and E1.	Essential hypertension, myocardial infarction	1p33	47096868	47129437	32569	4	0.122816	8142.25	1
DRD1	1812	dopamine receptor D1	This is one of the five types (D1 to D5) of receptors for dopamine. The activity of this receptor is mediated by G proteins which activate adenylyl cyclase	schizophrenia, genetic hypertension, essential hypertension	5q35.1	174790281	174813769	23488	7	0.298025	3355.43	0.2
DRD2	1813	dopamine receptor D2	One of the five types (D1 to D5) of receptors for dopamine. The activity of this receptor is mediated by G proteins which inhibit adenylyl cyclase	schizophrenia, obesity,	11q23	112775528	112861091	85563	18	0.210371	4753.5	0.853333
ECE1	1889	endothelin converting enzyme 1	Converts big endothelin-1 to endothelin-1.	Hirschsprung disease, cardiac defects, and autonomic dysfunction; heart failure; cardiovascular diseases	1p36.1	21281658	21372213	90555	8	0.0883441	11319.4	0.343434
EDN1	1906	endothelin 1	Endothelins are endothelium-derived vasoconstrictor peptides	Hypertension pulmonary; heart failure; hypertension arterial; cardiovascular diseases; preeclampsia	6p24.1	12388645	12414761	26116	10	0.382907	2611.6	0.5
EDN2	1907	endothelin 2	Endothelins are endothelium-derived vasoconstrictor peptides	essential hypertension, cardiovascular diseases, renal failure	1p34	41603542	41629390	25848	2	0.0773754	12924	0.25
EDNRA	1909	endothelin-A receptor	Receptor for endothelin-1. Mediates ist action by association with G proteins that activate a phosphatidylinositol - calcium second messenger system.	Heart failure; hypertension arterial; hypertension pulmonary	4q31.22	148749735	148833710	83975	33	0.392974	2544.7	0.803922
GAL	51083	galanin prepropeptide	Contracts smooth muscle of the gastrointestinal and genitourinary tract, regulates growth hormone release, modulates insulin release, and may be involved in the control of adrenal secretion	obesity, hypoglycemia, inflammation, hyperglycemia	11q13.2	68198559	68225218	26659	4	0.150043	6664.75	0.2
GCG	2641	glucagon	1. glucagon promotes hydrolysis of glycogen and lipids, and raises the blood sugar level. 2. GLP stimulates intestinal growth and upregulates villus height in the small intestine, concominant with increased crypt cell proliferation and decreased enterocyte apoptosis.	Hyperglycemia; obesity; coronary artery disease: heart failure; acute myocardial infarction	2q36-q37	162814896	162844264	29368	8	0.272405	3671	0
GCK	2645	glucokinase (hexokinase 4, maturity onset diabetes of the young 2)	Catalyzes the initial step in utilization of glucose by the beta-cell and liver at physiological glucose concentration. Glucokinase has a high Km for glucose, and so it is effective only when glucose is abundant. The role of GCK is to provide G6P for the synthesis of glycogen. Pancreatic glucokinase plays an important role in modulating insulin secretion. Hepatic glucokinase helps to facilitate t…	hyperglycemia, obesity	7p15.3-p15.1	43947110	44012278	65168	8	0.12276	8146	0.473684
GFPT1	2673	glutamine-fructose-6-phosphate transaminase 1	Controls the flux of glucose into the hexosamine pathway. Most likely involved in regulating the availability of precursors for N- and O-linked glycosylation of proteins	renal disease, obesity	2p13	69454058	69535976	81918	10	0.122073	8191.8	0.909091
GH1	2688	growth hormone 1	Plays an important role in growth control. Its major role in stimulating body growth is to stimulate the liver and other tissues to secrete IGF-1. It stimulated both the differentiation and proliferation of myoblasts. It also stimulates amino acid uptake and protein synthesis on muscle and other tissues.	Isolated growth hormone deficiency, IIIig type with absent GH.	17q24.2	59338296	59359930	21634	2	0.0924471	10817	0
GH2	2689	growth hormone 2	Plays an important role in growth control. Its major role in stimulating body growth is to stimulate the liver and other tissues to secrete IGF-1. It stimulated both the differentiation and proliferation of myoblasts. It also stimulates amino acid uptake and protein in muscle and other tissues.	Tumors; choriocarcinoma	17q24.2	59301306	59322955	21649	2	0.092383	10824.5	0
GIPR	2696	gastric inhibitory polypeptide receptor	This is a receptor for GIP. The activity of this receptor is mediated by G proteins which activate adenylyl cyclase.	Cushing syndrome; hyperplasia	19q13.3	50853342	50887557	34215	0	0	NA	0
GLP1R	2740	glucagon-like peptide 1 receptor	This is a receptor for glucagon-like peptide 1. The activity of this receptor is mediated by G proteins which activate adenylyl cyclase	obesity, metabolic disorder, cardiovascular diseases	6p21	39114595	39173497	58902	17	0.288615	3464.82	0.484375
GNB3	2784	Guanine nucleotide-binding protein, beta polypeptide-3	Guanine nucleotide-binding proteins (G proteins) are involved as a modulator or transducer in various transmembrane signaling systems. The beta and gamma chains are required for the GTPase activity, for replacement of GDP by GTP, and for G protein-effector interaction.	Hypertension, essential, susceptibility to	12p13	6809636	6836817	27181	2	0.0735808	13590.5	0
GYS1	2997	glycogen synthase 1 (muscle)	Transfers the glycosyl residue from UDP-Glc to the nonreducing end of alpha-1,4-glucan	hyperinsulinemia, hypoglycemia	19q13.3	54153195	54198361	45166	2	0.0442811	22583	0
GYS2	2998	glycogen synthase 2 (liver)	Transfers the glycosyl residue from UDP-Glc to the nonreducing end of alpha-1,4-glucan	liver glycogen synthase deficiency	12p12.2	21570390	21659048	88658	19	0.214307	4666.21	0.765957
HP	3240	haptoglobin	Haptoglobin combines with three palsma hemoglobin, preventing loss of iron through the kidneys and protecting the kidneys from damage by hemoglobin, while making the hemoglobin accessible to degradative enzymes.	Anhaptoglobinemia; hypohaptoglobinemia	16q22.1	70636009	70662458	26449	0	0	NA	1
HSD11B1	3290	Hydroxysteroid, 11-beta, dehydrogenase 1	Catalyzes reversibly the conversion of cortisol to the inactive metabolite cortisone.	Cortisone reductase deficiency, 604931 (3)	1q32-q41	206237945	206306689	68744	16	0.232748	4296.5	0.678571
HSD11B2	3291	Hydroxysteroid (11-beta) dehydrogenase 2	Has a role in modulating glucocorticoid activity both at the level of the mineralcorticoid receptor and the glucocorticoid receptor. Uses NADH while 11-DH1 uses NADPH. Catalyzes non reversibly the conversion of cortisol to the inactive metabolite cortisone.	Apparent mineralocorticoid excess, hypertension due to (3);Hypertension, mild low-renin (3)	16q22	66012537	66038953	26416	1	0.0378558	26416	0
IAPP	3375	islet amyloid polypeptide	Selectively inhibits insulin-stimulated glucose utilization and glycogen deposition in muscle, while not affecting adipocyte glucose metabolism.	IAPP is the peptide subunit of amyloid found in pancreatic islets of type 2 diabetic patients and in insulinomas.	12p12.3-p12.1	21407085	21433683	26598	2	0.0751936	13299	0.8
ICAM1	3383	intercellular adhesion molecule 1 (CD54), human rhinovirus receptor	ICAM proteins are ligands for the leukocyte adhesion LFA-1 protein (integrin alpha-L/beta-2)	Malaria, cerebral	19p13.3-p13.2	10232779	10268291	35512	1	0.0281595	35512	0.142857
ICAM2	3384	intercellular adhesion molecule 2	ICAM proteins are ligands for the leukocyte adhesion LFA-1 protein (integrin alpha-L/beta-2). ICAM2 may play a role in lymphocyte recirculation by blocking LFA-1 dependent cell adhesin. It mediates adhesive interactions important for antigen- specific immune responce, NK-sell mediated clearance, lymphocyte recirculation, and other cellular interactions important for immune response and surveillan…	Inflammation; multiple sclerosis; senile plaques	17q23-q25	59423688	59447839	24151	3	0.124218	8050.33	0.666667
ICAM3	3383	intercellular adhesion molecule 1 (CD54), human rhinovirus receptor	ICAM proteins are ligands for the leukocyte adhesion protein LFA-1 (integrin alpha-L/beta-2). In case of rhinovirus infection acts as a cellular receptor for the virus. Also acts as receptor for some coxsackieviruses	atherosclerosis, inflammation, coronary artery disease	19p13.3-p13.2	10295454	10321300	25846	2	0.0773814	12923	0.538462
IGF1	3479	insulin-like growth factor 1 (somatomedin C)	The insulin-like growth factors, isolated from plasma, are structurally and functioanlly related to insulin bu have a much higher growth-promoting activity.	Growth retardation with deafness and mental retardation.	12q22-q23	101282143	101386791	104648	26	0.248452	4024.92	0.785714
IGF2	3481	insulin-like growth factor 2 (somatomedin A)	The insulin-like growth factors possess growth-promoting activity. In vitro, they are potent mitogens for cultured cells. IGF-II is influenced by placental lactogen and may play a role in fetal development	hypoglycemia, renal failure chronic	11p15.5	2096924	2137409	40485	4	0.098802	10121.2	0.428571
INS	3630	insulin	Insulin decreases blood glucose concentration. It increases cell permeability to monosaccharides, amino acids and fatty acids. It accelerates glycolysis, the pentose phosphate cycle, and glycogen synthesis in liver	diabetes mellitus, obesity, atherosclerosis, coronary heart disease, essential hypertension	11p15.5	2127585	2149015	21430	0	0	NA	0
INSR	3643	insulin receptor	This receptor binds insulin and has a tyrosine-protein kinase activity. Isoform Short has a higher affinity for insulin. Mediates the metabolic functions of insulin. Binding to insulin stimulates association of the receptor with downstream mediators including IRS1 and phosphatidylinositol 3'-kinase (PI3K). Can activate PI3K either directly by binding to the p85 regulatory subunit, or indirectly v…	Diabetes mellitus, Hyperinsulinemic hypoglycemia, essential hypertension, aldosteronism primary, renal disease, coronary artery disease, heart failure, hypertension arterial	19p13.3-p13.2	7053266	7255011	201745	36	0.178443	5604.03	0.347222
IPF1/PDX1	3651	pancreatic and duodenal homeobox 1	Activates insulin, somatostatin, glucokinase, islet amyloid polypeptide and glucose transporter type 2 gene transcription.	hyperglycemia, myocardial infarction, hypercholesterolemia	13q12.1	27382157	27407394	25237	2	0.0792487	12618.5	1
KCNJ1	3758	potassium inwardly-rectifying channel, subfamily J, member 1	In the kidney, probably palys a major role in K+ homeostasis. Iward rectifier K+ channels are characterized by a greater tendancy to allow potassium to flow into the sell rather than out of it. Their voltage dependance is regulated by yhe concentration of extracellular potassium; as external K+ is rased, the voltage range of the channel opening shifts to more positive voltages. the inward rectifi…	Bartter syndrome type 2, characterized by an hypokalemic,hypochloremic metabolic alkalosis with hyperkaliury,hyperexcretion of prostaglandin E,hyperreninemia hyperaldosteronism with normal blood pressure,insensitivity to AGT2,and hyperplasia of juxtaglomerular apparatus,autosomal recessive. Presenting as an antenatal form with hydramnios prematurity and dehydration at birth and a classic form wit…	11q24	128203125	128252478	49353	14	0.283671	3525.21	0.655172
KCNJ11	3767	potassium inwardly-rectifying channel, subfamily J, member 11	This receptor is controlled by G proteins. Inward rectifier K+ channels are characterized by a greater tendancy to allow potassium to flow into the cell rather than out of it. Their voltage dependance is regulated by the concentration of extracellular potassium; as external K+ is raised, the voltage range of the channel opening shifts to more positive voltages. The inward rectifications is mainly…	Persistent hyperinsulinemic hypoglycemia of infancy.	11p15.1	17353374	17376782	23408	6	0.256323	3901.33	0.5
KCNJ6	3763	potassium inwardly-rectifying channel, subfamily J, member 6	This potassium channel may be involved in the regulation of insulin secretion by glucose and/or neurotransmitters acting through G-protein-coupled receptors.	Insulinoma	21q22.13-q22.2	37908657	38220566	311909	113	0.362285	2760.26	0.695793
KLK1	3816	kallikrein 1, renal/pancreas/salivary	Glandural kallikreins cleave Met-Lys and Arg-Ser bonds in kininogen to release Lys-bradykinin	Renal failure chronic; cancer	19q13.2-q13.4	56004216	56028855	24639	5	0.20293	4927.8	0.571429
LDLR	6547	low density lipoprotein receptor (familial hypercholesterolemia)	Binds LDL, the major cholesterol-carrying lipoprotein of plasma, and transports it into cells by endocytosis.	hypercholesterolemia familial, atherosclerosis	19p13.3	11051132	11115490	64358	6	0.0932285	10726.3	0.354839
LPL	4023	lipoprotein lipase	The primary function of this lipase is the hydrolysis of triglycerides of circulating chylomicrons and very low density lipoproteins (VLDL). The enzyme functions in the presence of apolipoprotein C-2 on the luminal surface of vascular endothelium	endogenous hypertriglyceridemia, atherosclerosis, coronary heart disease, coronary artery disease, coronary atherosclerosis, essential hypertension	8p22	19831058	19879049	47991	8	0.166698	5998.88	0.590909
LRP8	7804	low density lipoprotein receptor-related protein 8, apolipoprotein e receptor.	Cell surface receptor for Reelin (RELN) and apolipoprotein E (apoE)-containing ligands.	Myocardial infarction	1p34	53413233	53515842	102609	20	0.194915	5130.45	0.481013
MTHFR	4524	5,10-methylenetetrahydrofolate reductase (NADPH)	Catalyzes the conversion of 5,10- methylenetetrahydrofolate to 5-methyltetrahydrofolate, a co- substrate for homocysteine remethylation to methionine	thrombophilia, venous thrombosis, cardiovascular diseases, atherosclerosis, coronary heart disease	1p36.3	11770053	11810381	40328	7	0.173577	5761.14	0.742857
NEDD4L	23327	neural precursor cell expressed, developmentally down-regulated 4-like	E3 ubiquitin-protein ligase which accepts ubiquitin from an E2 ubiquitin-conjugating enzyme in the form of a thioester and then directly transfers the ubiquitin to targeted substrates. Inhibits TGF-beta signaling by triggering SMAD2 and TGFR1 ubiquitination and proteasome-dependent degradation. Promotes ubiquitination and internalization of various plasma membrane channels	liddles syndrome, essential hypertension, hypotension orthostatic	18q21	53852778	54226369	373591	99	0.264996	3773.65	0.774942
NOS3	4846	nitric oxide synthase 3 (endothelial cell)	Produces nitric oxide (NO) which is implicated in vascular smooth muscle relaxation through as SBMP-mediated signal transduction pathway. NO mediates vascular endothelial growth factor (VEGF)-induced angiogenesis in coronary vessels and promotes blood clotting through the activation of platelets.	Preeclampsia, susceptibility to; coronary spasm	7q36	150115795	150159323	43528	6	0.137842	7254.67	0.2
NPPA	4878	natriuretic peptide precursor A	Atrial natriuretic factor (ANF) is a potent vasoactive substance synthesized in mammalian atria and is thought to play a key role in cardiovascular homeostasis. Has a CGMP-stimulating activity.	Heart failure; heart failure congestive; essential hypertension; cardiac hypertrophy	1p36.21	11830042	11852101	22059	10	0.45333	2205.9	0.8
NPPB	4879	natriuretic peptide precursor B	Acts as a cardiac hormone with a variety of biological actions including natriuresis, diuresis, vasorelaxation, and inhibition of renin and aldosterone secretion. It is thought to play a key role in cardiovascular homeostasis. Helps restore the body´s salt and water balance. improves heart function.	Heart failure; heart failure congestive; heart diseases; cardiac overload	1p36.2	11841788	11863258	21470	4	0.186306	5367.5	0
NPPC	4880	natriuretic peptide precursor C	Vasorelaxant activity. Has a CGMP-stimulating activity.	Heart failure; heart failure congestive; cardiovascular diseases	2q24-qter	232605640	232626464	20824	2	0.096043	10412	0
NPR1	4881	natriuretic peptide receptor A/guanylate cyclase A (atrionatriuretic peptide receptor A)	Receptor for atrial natriuretic peptide. Has guanylate cyclase activity on binding of ANF.	Cardiac hypertrophy; heart failure congestive; essential hypertension; heart failure	1q21-22	150454186	150489536	35350	3	0.0848656	11783.3	0.8
NPR2	4882	natriuretic peptide receptor B/guanylate cyclase B (atrionatriuretic peptide receptor B)	Receptor for atrial natriuretic peptide. Has guanylate cyclase activity on binding of ANF. Seems to be stimulated more effectively by brain natriuretic peptide (BNP) than by ANP.	Acromesomelic dysplasia Maroteaux type (AMDM); heart failure; heart failure congestive; essential hypertension	9p21-p12	35772406	35809727	37321	7	0.187562	5331.57	0.928571
NPY	4852	neuropeptide Y	NPY is implicated in the control of feeding and in secretion of gonadotrophin-release hormone.	Essential hypertension; obesity; pheochromocytoma	7p15.1	24087049	24114717	27668	10	0.361428	2766.8	0.647059
NPY1R	4886	neuropeptide Y receptor Y1	Receptor for neuropeptide Y and peptide YY.	Obesity; adenocarcinoma	4q31.3-q32	164592722	164621353	28631	7	0.24449	4090.14	0.75
NR3C1	2908	Nuclear receptor subfamily 3, group C, member 1 (glucocorticoid receptor)	The steroid hormones and their receptors are involved in the regulation of eucaryotic gene expression and affect cellular proliferation and differentiation in target tissues. Binds to the GRE target site.	Cortisol resistance	5q31	142627689	142805270	177581	13	0.073206	13660.1	0.629032
PLA2G1B	5319	phospholipase A2, group IB (pancreas)	PA2 catalyzes the calcium-dependent hydrolysis of the 2-acyl groups in 3-sn-phosphoglycerides.	Inflammation; acute pancreatitis	12q23-q24.1	119212635	119238312	25677	6	0.233672	4279.5	1
PNMT	5409	Phenylethanolamine N-methyltransferase	Converts noradrenaline to adrenaline	Hypertension, essential,	17q21-q22	35068033	35090254	22221	2	0.090005	11110.5	0
PPP1CA	5499	protein phosphatase 1, catalytic subunit, alpha isoform	Protein phosphatase 1 (PP1) is essential for cell division, and participates in the regulation of glycogen metabolism, muscle contractility and protein synthesis. Involved in regulation of ionic conductances and long-term synaptic plasticity. May play an important role in dephosphorylating substrates such as the postsynaptic density-associated Ca(2+)/calmodulin dependent protein kinase II	Leukemia, Lymphocytic, Acute, L1	11q13	66912228	66935952	23724	3	0.126454	7908	1
PPP1CC	5501	protein phosphatase 1, catalytic subunit, gamma isoform	Protein phosphatase 1 (PP1) is essential for cell division, and participates in the regulation of glycogen metabolism, muscle contractility and protein synthesis. Involved in regulation of ionic conductances and long-term synaptic plasticity. May play an important role in dephosphorylating substrates such as the postsynaptic density-associated Ca(2+)/calmodulin dependent protein kinase II	not known	12q24.1-q24.2	109610464	109653387	42923	2	0.0465951	21461.5	0.909091
PRCP	5547	prolylcarboxypeptidase (angiotensinase C)	Cleaves C-terminal amino acids linked to proline in peptides such as angiotensin II, III and des-Arg9-bradykinin	chronic hypertension, coronary heart disease	11q14	82203058	82299205	96147	26	0.270419	3697.96	0.85
PTGER2	5732	prostaglandin E receptor 2 (subtype EP2)	Receptor for prostaglandin E2 (PGE2). The activity of this receptor is mediated by G(s) proteins that stimulate adenylate cyclase. The subsequent raise in intracellular cAMP is responsible for the relaxing effect of this receptor on smooth muscle	atherosclerosis, stroke, inflammation	14q22	51840863	51875070	34207	5	0.146169	6841.4	0
PTGIR	5739	prostaglandin I2 (prostacyclin) receptor (IP)	Receptor for prostacyclin (prostaglandin I2 or PGI2). The activity of this receptor is mediated by G(s) proteins which activate adenylate cyclase	atherosclerosis, cardiovascular diseases, arthritis	19q13.3	51805566	51830194	24628	3	0.121813	8209.33	1
PTGIS	5740	Prostaglandin 12 synthase	Catalyzes the isomerization of prostaglandin H2 to prostacyclin (=prostaglandin 12).	Hypertension, essential,	20q13.11-q13.13	47543818	47628114	84296	19	0.225396	4436.63	0.642857
PTGS1	5742	prostaglandin-endoperoxide synthase 1	May play an important role in regulating or promoting cell proliferation in some normal and neoplastically transformed cells	atherosclerosis, thrombosis, coronary heart disease, renal failure acute, acute myocardial infarction	9q32-q33.3	122202783	122247535	44752	18	0.402217	2486.22	0.78125
PTHLH	5744	parathyroid hormone-like hormone	Neuroendocrine peptide which is a critical regulator of cellular and organ growth, development, migration, differentiation and survival and of epithelial calcium ion transport. Regulates endochondral bone development and epithelial-mesenchymal interactions during the formation of the mammary glands and teeth	hypercalcemia, renal failure	12p12.1-p11.2	27992285	28026183	33898	2	0.0590005	16949	0.333333
PTHR1	5745	parathyroid hormone receptor 1	This is a receptor for parathyroid hormone and for parathyroid hormone-related peptide. The activity of this receptor is mediated by G proteins which activate adenylyl cyclase and also a phosphatidylinositol-calcium second messenger system	pseudohypoparathyroidism, renal failure chronic, renal failure	3p22-p21.1	46884240	46930290	46050	3	0.0651466	15350	0
REN	5972	renin	Renin is a highly specific endopeptidase, whose only known function is to generate angiotensin I from angiotensinogen in the plasma, initiating a cascade of reactions that produce an elevation of blood pressure and increased sodium retention by the kidney.	Hyperproreninemia	1q32	200845605	200877122	31517	10	0.317289	3151.7	0.666667
RENBP	5973	renin binding protein	Catalyzes the interconversion of N-acetylglucosamine to N-acetylmannosamine. Binds to renin forming a protein complex called high molecular weight (HMW) renin and inhibits renin activity	essential hypertension, renal disease	Xq28	152711570	152741079	29509	1	0.033888	29509	0.5
SCNN1A	6337	Sodium channel, nonvoltage-gated 1, alpha	Sodium permeable non-voltage-sensitive ion channel inhibited by the diuretic amiloride. Mediate the electodiffusion of the luminal sodium (and water, which follows osmotically) through the apical membrane of epithelial cells. Controls the reabsorption of sodium in kidney, colon, lung and sweat glends. Also plays a role in taste preception.	Pseudohypoaldosteronism, type I,	12p13	6316276	6364976	48700	6	0.123203	8116.67	0.25
SCNN1B	6338	sodium channel, nonvoltage-gated 1, beta	Sodium permeable non-voltage-sensitive ion channel inhibited by the diuretic amiloride. Mediate the electodiffusion of the luminal sodium (and water, which follows osmotically) through the apical membrane of epithelial cells. Controls the reabsorption of sodium in kidney, colon, lung and sweat glands. Also plays role in taste perception.	Liddle syndrome, 177200 (3); Pseudohypoaldosteronism, type I,	16p12.2-p12.1	23211141	23310117	98976	15	0.151552	6598.4	0.512821
SCNN1D	6339	sodium channel, nonvoltage-gated 1, delta	Sodium permeable non-voltage-sensitive ion channel inhibited by the diuretic amiloride. Mediates the electrodiffusion of the luminal sodium (and water, which follows osmotically) through the apical membrane of epithelial cells. Controls the reabsorption of sodium in kidney, colon, lung and sweat glands.	not known	1p36.3-p36.2	1247499	1277332	29833	1	0.0335199	29833	1
SCNN1G	6340	Sodium channel, nonvoltage-gated 1, gamma	Sodium permeable non-voltage-sensitive ion channel inhibited by the diuretic amiloride. Mediate the electodiffusion of the luminal sodium (and water, which follows osmotically) through the apical membrane of epithelial cells. Controls the reabsorption of sodium in kidney, colon, lung and sweat glands. Also plays a role in taste perception.	Liddle Syndrome, pseudohypoaldosteronism type 1	16p12	23091541	23145701	54160	5	0.0923191	10832	0.804878
SELE	6401	selectin E (endothelial adhesion molecule 1)	Expressed on cytokine induced endothelial cells and mediates their binding to leukocytes. The ligand recognized by ELAM-1 is sialyl-lewis X (alpha (1->3) fucosylated derivatives of polylactosamine that are found at the nonreducung termini of glycolipids.	Atherosclerosis, susceptibility to	1q22-125	166413440	166444837	31397	19	0.605153	1652.47	0.90625
SERPINA4	5267	serine (or cysteine) proteinase inhibitor, clade A (alpha-1 antiproteinase, antitrypsin), member 4	Inhibits human amidolytic and kininogenase activities of human tissue kallikrein. Inhibition is achived by formation of an equimolar, heat- and SDS-stable complex between the inhibitor and the enzyme, and generation of a small C-terminal fragment of the inhibitor due to cleavage at the reactive site tissue kallikrein.	Arthritis; ischemia; inflammation	14q31-q32.1	94087536	94115994	28458	10	0.351395	2845.8	0.913043
SGK	6446	serum/glucocorticoid regulated kinase	Protein kinase that plays an important role in cellular stress response. Activates certain potassium, sodium, and chloride channels, suggesting an involvement in the regulation of processes such as cell survival, neuronal excitability, and renal sodium excretion. Sustained high levels and activity may contribute to conditions such as hypertension and diabetic nephropathy.	essential hypertension, cardiac hypertrophy, renal failure chronic	6q23	134522082	134547695	25613	4	0.156171	6403.25	1
SLC12A1	6557	Solute carrier family 12 (sodium/potassium/chloride transporters), member 1	Electrically silent transporter system. Mediates sodium and chloride reabsorption. Plays a vital role in the regulation of ionic balance and cell volume	Bartter syndrome, hypokalemic, hypochloremic metabolic alkalosis with hyperkaliury, hyperexcretion of prostaglandin E, hyperreninemia hyperaldosteronism with normal blood pressure, intensitivity to AGT2, and hyperplasia of juxtaglomerular apparatus, autosomal recessive, presenting as an atenatal form with hydramnios prematurity and dehydration at built and a classic form with failure to thrive.	15q15-q21.1	46277190	46392416	115226	13	0.112822	8863.54	0.933333
SLC12A3/HTSC	6559	Solute carrier family 12 (sodium/potassium/chloride transporters), member 3	Electrically silent transporter system. Mediates sodium and chloride reabsorption.	Gitelman syndrome characterized by and hypokalemic alkalosis Bartter-like associated with hypocalciuria and hypomagnesemia.	16q13	55446643	55514850	68207	15	0.219919	4547.13	0.648649
SLC12A4	6560	solute carrier family 12 (potassium/chloride transporters), member 4	Mediates electroneutral potassium-chloride cotransport when activated by cell swelling. May contribute to cell volume homeostasis in single cells. May be involved in the regulation of basolateral Cl(-) exit in NaCl absorbing epithelia	sickle cell disease	16q22.1	66525731	66570026	44295	3	0.0677277	14765	0.875
SLC14A2	8170	solute carrier family 14 (urea transporter), member 2	Specialized low-affinity urea transporter. Mediates urea transport in kidney	hypertension	18q12.1-q21.1	41438764	41527056	88292	43	0.48702	2053.3	0.605263
SLC22A2	6582	Solute carrier family 22 (organic cation transporter), member 2	solute carrier family 22,member A2,polyspecific transporter oforganic cations,mainly expressed in kidney	Cardiomyopathy; renal failure; hodgkin disease	6q26	160598203	160660370	62167	16	0.257371	3885.44	0.803922
SLC2A2	6514	solute carrier family 2 (facilitated glucose transporter) member 2	Facilitative glucose transporter. This isoform likely mediates the bidirectional transfer of glucose across the plasma membrane of hepatocytes and is responsible for uptake of glucose by the beta cells; may comprise part of the glucose-sensing mechanism of the beta cell. May also participate with the Na+/glucose cotransporter in the transcellular transport of glucose in the small intestine and ki…	Diabetes mellitus, noninsulin-dependent; Fanconi-Bickel	3q26.1-q26.2	172186839	172237470	50631	8	0.158006	6328.88	0.814815
SLC2A3	6515	solute carrier family 2 (facilitated glucose transporter), member 3	Facilitative glucose transporter. Probably a neuronal glucose transporter	hyperglycemia, obesity	12p13.3	7953094	7990138	37044	4	0.10798	9261	0.4
SLC2A4	6517	solute carrier family 2 (facilitated glucose transporter) member 4	Insulin-regulated facilitative glucose transporter.	Diabetes mellitus, noninsulin-dependent.	17p13	7115778	7142090	26312	1	0.0380055	26312	0.2
SLC4A1	6521	solute carrier family 4, anion exchanger, member 1	Band 3 is the major integral glycoprotein of the erytrocyte membrane. Band 3 has two functional domains. Its integral domain mediates a 1: exchange of inorganic anions across the membrane, whereas its cytoplasmic domain provides binding sites for cytoskeletal proteins, glycolytic enzymes, and hemoglobin.	Acanthocytosis, one form; Elliptocytosis, Malaysian-Melanesian	17p21-q22	39672566	39710993	38427	1	0.0260234	38427	0
SLC4A3	6508	solute carrier family 4, anion exchanger, member 3	Plasma membrane anion exchange protein of wide distribution.	neurological disease	2q36	220307792	220342197	34405	3	0.0871966	11468.3	0
SLC5A2	6524	solute carrier family 5 (sodium/glucose cotransporter), member 2	Sodium-dependent glucose transporter. Efficient substrate transport in mammalian kidney is provided by the concerted action of a low affinity high capacity and a high affinity low capacity Na(+)/glucose cotransporter arranged in series along kidney proximal tubules	renal glucosuria	16p12-p11	31391940	31419590	27650	0	0	NA	0.333333
SLC6A2	6530	solute carrier family 6 member 2	Amine transporter. Terminates the action of noradrenaline by its high affinity sodium-dependent reuptake into presynaptic terminals.	Orthostatic intolerance.	16q12.2	54238057	54305199	67142	30	0.446814	2238.07	0.704225
SLC8A2	6543	solute carrier family 8 (sodium-calcium exchanger), member 2	Rapidly transports Ca(2+) during excitation-contraction coupling. Ca(2+) is extruded from the cell during relaxation so as to prevent overloading of intracellular stores	ischemia	19q13.3	52613735	52676934	63199	8	0.126584	7899.88	0.6
SLC9A1	6548	solute carrier family 9 (sodium/hydrogen exchanger), member 1	Involved in pH regulation to eliminate acids generated by active metabolism or to counter adverse environmental conditions. Major proton extruding system driven by the inward sodium ion chemical gradient. Plays an important role in signal transduction	essential hypertension, ischemia, heart failure	1p36.1-p35	27099449	27175543	76094	6	0.0788498	12682.3	1
SLC9A2	6549	solute carrier family 9 (sodium/hydrogen exchanger), member 2	Involved in pH regulation to eliminate acids generated by active metabolism or to counter adverse environmental conditions. Major proton extruding system driven by the inward sodium ion chemical gradient. Seems to play an important role in colonic sodium absorption	not known	2q11.2	102684684	102796325	111641	30	0.268718	3721.37	0.739726
SLC9A5	6553	solute carrier family 9 (sodium/hydrogen exchanger), member 5	Involved in pH regulation to eliminate acids generated by active metabolism or to counter adverse environmental conditions. Major proton extruding system driven by the inward sodium ion chemical gradient. Plays an important role in signal transduction	not known	16q22.1	65830356	65873594	43238	0	0	NA	1
TBXA2R	6915	thromboxane A2 receptor	Receptor for thromoxane A2 (TXA2), a potent stimulatro of patelet aggregation. The activity of this receptor is mediated by a G-protein that activate a phosphatidylinositol-calcium second messenger system. In the kidney, the binding of TXA2 to glomerular TP receptors causes intensive vasocontriction.	Bleeding disorder due to defective thromboxane A2 receptor	19p13.3	3535504	3567658	32154	0	0	NA	0
TGFB1	7040	Transforming growth factor beta-1 (Camurati-Engelmann disease)	Multifunctional peptide that controls proliferation, differentiation, and other functions in many cell types. Many cells synthesize TGF-beta 1 and essentially all of them have specigic receptors for this peptide. TGF-beta 1 regulated the actions of many other peptide growth factors and determines a positive or negative direction of their effects,	Camurati-Engelmann disease	19q13.2	46518491	46561656	43165	4	0.0926677	10791.2	0.2
TH	7054	tyrosine hydroxylase	Plays an important role in the physiology of adrenergic neurons	Segawa syndrome, neurodegenerative diseases, infarct, cardiovascular diseases, heart failure,	11p15.5	2131736	2159611	27875	0	0	NA	0
TRHR	7201	thyrotropin-releasing hormone receptor	Receptor for thyrotropin-releasing hormone. This receptor is mediated by G proteins which activate a phosphatidylinositol-calcium second messenger system.	Isolated central hypothyroidism with TSH and PRL levels unresponsive to TRH (inactivating mutations of TRHR)	8q23	110158902	110210989	52087	13	0.249582	4006.69	0.918919
TRIP10	9322	thyroid hormone receptor interactor 10	Required for translocation of GLUT4 to the plasma membrane in response to insulin signaling	wiskott-aldrich syndrome	19p13.3	6680707	6712528	31821	3	0.0942774	10607	0.142857
UCP3	7352	uncoupling protein 3	UCP are mitochondrial transporter proteins that create proton leaks across the inner mitochondrial membrane, thus uncoupling oxidative phosphorylation.	obesity, pulmonary disease chronic obstructive	11q13	73378985	73407778	28793	7	0.243115	4113.29	0.6
VEGFA	7422	vascular endothelial growth factor A	Growth factor active in angiogenesis, vasculogenesis and endothelial cell growth. Induces endothelial cell proliferation, promotes cell migration, inhibits apoptosis, and induces permeabilization of blood vessels.	chronic myocardial ischemia, atherosclerosis	6p12	43835931	43872199	36268	5	0.137863	7253.6	0.0769231
VEGFB	7423	vascular endothelial growth factor B	Growth factor for endothelial cells.	atherosclerosis, cardiovascular diseases, ischemia	11q13	63748842	63772834	23992	0	0	NA	0
VEGFC	7424	vascular endothelial growth factor C	Growth factor active in angiogenesis, and endothelial cell growth, stimulating their proliferation and migration and also has effects on the permeability of blood vessels. May function in angiogenesis of the venous and lymphatic vascular systems during embryogenesis, and also in the maintenance of differentiated lymphatic endothelium in adults.	cardiovascular diseases, myocardial ischemia, carcinoma renal cell	4q34.1-q34.3	177969840	178099044	129204	20	0.154794	6460.2	0.883117
WNK1	65125	Pseudohypoaldosteronism, type IIC	Controls sodium and chloride ion transport by inhibiting the activity of WNK4, potentially by either phosphorylating the kinase or via an interaction between WNK4 and the autoinhibitory domain of WNK1. WNK4 regulates the activity of the thiazide- sensitive Na-Cl cotransporter, SLC12A3, by phosphorylation. WNK1 may also play a role in actin cytoskeletal reorganization	Pseudohypoaldosteronism, type IIC; essential hypertension	12p13	722993	898219	175226	27	0.154087	6489.85	0.892157
WNK4	65266	Pseudohypoaldosteronism type II	Regulates the activity of the thiazide-sensitive Na-Cl cotransporter, SLC12A3, by phosphorylation which appears to prevent membrane trafficking of SLC12A3. Also inhibits the renal K(+) channel, KCNJ1, via a kinase-independent mechanism by which it induces clearance of the protein from the cell surface by clathrin-dependent endocytosis. WNK4 appears to act as a molecular switch that can vary the b…	Pseudohypoaldosteronism type II	17p21-q22	38176222	38212605	36383	1	0.0274854	36383	0
