# Supplementary material for: Targeting 160 Candidate Genes for Blood Pressure Regulation with a Genome-Wide Genotyping Array
Source: PLoS One. 2009 Jun 29;4(6):e6034. doi: 10.1371/journal.pone.0006034 (PMC2699027; doi:10.1371/journal.pone.0006034)
Supplement: Table S3 — Demographics of the studied population samples. (0.01 MB XLS) [file pone.0006034.s003.xls]

## Sheet: Sheet1
Supporting Information, Table S3. Demographics of the studied population samples.
	KORA S3	KORA S4	HYPEST	BRIGHT
individuals*	1644	1830	1297	4908
individuals in quantitative analysis**	1017	1551	1070	0
cases/controls	364/596	447/1119	596/650	2904/2004
SBP (mean/SD)	133.8/19.0	129.2/18.9	139.6/18.4	141.5/23.3
DBP (mean/SD)	82.7/10.7	81.6/10.7	86.3/11.1	86.8/12.8
sex (m/f)***	813/831	906/924	447/850	1938/2970
age (mean/SD)	55.6/7.0	52.7/9.0	45.4/13.7	58.3/10.1
BMI (mean/SD)	27.7/4.2	25.6/2.7	26.2/3.9	26.6/3.8
* Number of individuals in the sample. ** Individuals without diabetes or antihypertensive medication *** Counts of male and female participants.
