# Supplementary material for: Targeting 160 Candidate Genes for Blood Pressure Regulation with a Genome-Wide Genotyping Array
Source: PLoS One. 2009 Jun 29;4(6):e6034. doi: 10.1371/journal.pone.0006034 (PMC2699027; doi:10.1371/journal.pone.0006034)
Supplement: Table S5 — Association results with SNPs entering replication performed in study samples stratified according to BMI of the participants. Results of regression analyses with age and sex as covariates. Meta analysis over indicated populations was performed using inverse variance method with a fixed effect model (0.02 MB XLS) [file pone.0006034.s005.xls]

## Sheet: Sheet1
Supporting Information, Table S5. Association results with SNPs entering replication performed in study samples stratified according to BMI of the participants. Results of regression analyses with age and sex as covariates. Meta analysis over indicated populations was performed using inverse variance method with a fixed effect model.
			BMI < 25 kg/m2									BMI ≥ 25 kg/m2
			KORA S3			Replication samples			KORA S3 and replication			KORA S3			Replication samples			KORA S3 and replication
SNP	Phenotype	Replication cohorts	Effect (Beta)	95% CI	P value	Effect (Beta)	95% CI	P value	Effect (Beta)	95% CI	P value	Effect (Beta)	95% CI	P value	Effect (Beta)	95% CI	P value	Effect (Beta)	95% CI	P value
rs10889553	DBP	KORA S4, HYPEST	1.228	-1.72; 4.17	0.4141	1.68598	0.11; 3.26	0.0355395	1.71	0.32; 3.11	0.0161	2.51	0.45; 4.57	0.017	0.0392172	-1.42; 1.5	0.958132	0.87	-0.32; 2.06	0.15
	HYP	KORA S4, HYPEST, BRIGHT	0.440832	-0.40; 1.26	0.2903	0.01	-0.34; 0.32	0.94	0.01	-0.34; 0.37	0.96	0.48858	0.08; 0.90	0.0189	0.07	-0.13; 0.28	0.48	0.16	-0.03; 0.34	0.0923
	SBP	KORA S4, HYPEST	4.968	-0.02; 9.96	0.05161	2.25884	-0.19; 4.71	0.0704668	2.94	0.71; 5.17	0.0098	4.84	1.37; 8.31	0.00641	-1.04022	-3.5; 1.42	0.406904	0.92	-1.08; 2.93	0.37
rs10954174	DBP	KORA S4	NA	NA; NA	NA	-10.4	-21.19; 0.39	0.0589121	-10.4	-21.19; 0.39	0.0589121	26.47	12.39; 40.55	0.0002481	NA	NA; NA	NA	NA	NA; NA	NA
	HYP	KORA S4	NA	NA; NA	NA	0.884181	-1.41; 3.18	0.449436	0.884181	-1.41; 3.18	0.449436	22.5386	-inf; inf	0.9989	NA	NA; NA	NA	NA	NA; NA	NA
	SBP	KORA S4	NA	NA; NA	NA	-8.017	-26.14; 10.1	0.385899	-8.017	-26.14; 10.1	0.385899	20.23	-3.02; 43.48	0.08862	NA	NA; NA	NA	NA	NA; NA	NA
rs1105297	DBP	KORA S4	-2.212	-3.67; -0.72	0.003776	0.3966	-0.69; 1.48	0.473903	-0.509837	-1.39; 0.37	0.254421	-1.434	-2.68; -0.19	0.02423	0.1193	-0.87; 1.11	0.813971	-0.485643	-1.26; 0.29	0.220241
	HYP	KORA S4	-0.0612373	-0.48; 0.35	0.7712	0.0535408	-0.26; 0.37	0.739784	0.0110866	-0.24; 0.26	0.930957	-0.168537	-0.43; 0.10	0.205	-0.0364565	-0.24; 0.17	0.730655	-0.0877044	-0.25; 0.07	0.289761
	SBP	KORA S4	-0.839	-3.40; 1.72	0.5207	0.4628	-1.35; 2.28	0.617645	0.0261566	-1.46; 1.51	0.972392	-0.4095	-2.46; 1.64	0.6951	1.467	-0.24; 3.18	0.0924283	0.696066	-0.62; 2.01	0.298249
rs11195419	DBP	KORA S4, HYPEST	0.8247	-1.27; 2.92	0.4416	0.473128	-0.77; 1.71	0.453922	0.56	-0.50; 1.63	0.3	3.06	1.48; 4.64	0.000157	0.596579	-0.62; 1.81	0.335564	1.51	0.55; 2.47	0.0021
	HYP	KORA S4, HYPEST, BRIGHT	0.183155	-0.40; 0.77	0.5425	0.00838142	-0.21; 0.23	0.940417	0.0296555	-0.18; 0.24	0.777788	0.314811	0.00; 0.63	0.0521	0.155407	0; 0.31	0.0448061	0.18	0.05; 0.32	0.008
	SBP	KORA S4, HYPEST	-1.437	-5.02; 2.14	0.432	1.11	-0.79; 3.02	0.25	1.6	-0.17; 3.38	0.0771	3.63	0.96; 6.31	0.00797	1.59464	-0.46; 3.65	0.128184	2.44	0.67; 4.20	0.0069
rs2303934	DBP	KORA S4	-0.2146	-4.48; 4.05	0.9215	-2.826	-5.35; -0.3	0.028106	-2.14877	-4.32; 0.02	0.05238	2.03	-1.45; 5.51	0.253	-0.3833	-2.95; 2.18	0.769489	0.465993	-1.6; 2.53	0.658095
	HYP	KORA S4	1.04169	-0.04; 2.13	0.0596	-1.19303	-2.37; -0.01	0.0472827	0.0178579	-0.78; 0.82	0.965008	0.774727	0.11; 1.44	0.02231	0.179818	-0.32; 0.68	0.481048	0.395009	0; 0.79	0.0526956
	SBP	KORA S4	4.215	-3.11; 11.54	0.2604	-5.394	-9.63; -1.16	0.0125988	-2.98626	-6.65; 0.68	0.110592	2.542	-3.15; 8.23	0.3818	-0.5438	-4.98; 3.89	0.81018	0.62273	-2.88; 4.12	0.727262
rs3765894	DBP	KORA S4	-0.4551	-1.82; 0.91	0.5152	0.2504	-0.79; 1.3	0.638628	-0.00924971	-0.84; 0.82	0.98259	-0.7837	-1.88; 0.31	0.162	0.2994	-0.67; 1.27	0.544792	-0.175215	-0.9; 0.55	0.636337
	HYP	KORA S4	-0.415515	-0.82; -0.01	0.04259	-0.102808	-0.42; 0.22	0.526697	-0.223457	-0.47; 0.03	0.0791333	-0.203709	-0.43; 0.03	0.08894	0.0601539	-0.14; 0.26	0.550664	-0.0492186	-0.2; 0.1	0.523391
	SBP	KORA S4	-1.06	-3.41; 1.29	0.3761	0.02208	-1.73; 1.78	0.980318	-0.366356	-1.77; 1.04	0.609169	-1.204	-3.01; 0.60	0.1922	0.1071	-1.57; 1.78	0.900396	-0.499267	-1.73; 0.73	0.426135
rs405884	DBP	KORA S4	-2.224	-4.45; 0.01	0.05139	-1.09	-2.89; 0.71	0.234574	-1.53644	-2.94; -0.14	0.0314146	-1.299	-3.34; 0.74	0.2117	0.8073	-0.7; 2.32	0.294999	0.0594565	-1.15; 1.27	0.923491
	HYP	KORA S4	-1.18744	-2.04; -0.33	0.00636	-0.17352	-0.74; 0.39	0.547397	-0.483013	-0.95; -0.01	0.0445042	-0.546798	-0.99; 0.11	0.01581	-0.00803217	-0.33; 0.31	0.960626	-0.191302	-0.45; 0.07	0.147761
	SBP	KORA S4	-3.529	-7.39; 0.33	0.07375	-2.011	-5.02; 1	0.190163	-2.58555	-4.96; -0.21	0.0326315	-5.433	-8.77; -2.09	0.001502	1.538	-1.07; 4.15	0.248232	-1.10791	-3.16; 0.95	0.290985
NA - not applicable due to low allele frequency
