# Supplementary material for: Targeting 160 Candidate Genes for Blood Pressure Regulation with a Genome-Wide Genotyping Array
Source: PLoS One. 2009 Jun 29;4(6):e6034. doi: 10.1371/journal.pone.0006034 (PMC2699027; doi:10.1371/journal.pone.0006034)
Supplement: Table S6 — Association results with SNPs entering replication performed in study samples stratified according to smoking habits of the participants. Results of regression analyses with age and sex as covariates. Meta analysis over indicated populations was performed using inverse variance method with a fixed effect model. Non-smokers - never smoked. Smokers - smokers at the recruitment and/or previously during lifetime. (0.02 MB XLS) [file pone.0006034.s006.xls]

## Sheet: Sheet1
Supporting Information, Table S6. Association results with SNPs entering replication performed in study samples stratified according to smoking habits of the participants. Results of regression analyses with age and sex as covariates. Meta analysis over indicated populations was performed using inverse variance method with a fixed effect model. Non-smokers - never smoked. Smokers - smokers at the…
			smokers									nonsmokers
			KORA S3			Replication samples			KORA S3 and replication			KORA S3			Replication samples			KORA S3 and replication
SNP	Phenotype	Replication cohorts	Effect (Beta)	95% CI	P value	Effect (Beta)	95% CI	P value	Effect (Beta)	95% CI	P value	Effect (Beta)	95% CI	P value	Effect (Beta)	95% CI	P value	Effect (Beta)	95% CI	P value
rs10889553	DBP	KORA S4, HYPEST	2.988	0.23; 5.74	0.03401	1.44863	-0.17; 3.07	0.0793951	1.84347	0.45; 3.24	0.00962849	2.721	0.07; 5.37	0.04442	0.0650449	-1.81; 1.94	0.945726	0.95148	-0.58; 2.48	0.222472
	HYP	KORA S4, HYPEST	0.45869	-0.14; 1.06	0.1329	0.356087	0.01; 0.71	0.045804	0.382168	0.08; 0.68	0.0130641	1.05431	0.43; 1.68	0.000878	0.192288	-0.14; 0.53	0.260769	0.38666	0.09; 0.68	0.0101843
	SBP	KORA S4, HYPEST	5.579	1.18; 9.98	0.01323	0.965567	-1.69; 3.62	0.476014	2.1979	-0.08; 4.47	0.0580785	7.589	3.07; 12.11	0.001073	-0.340278	-3.53; 2.85	0.834355	2.29396	-0.31; 4.9	0.0844997
rs10954174	DBP	KORA S4	28.79	14.59; 43.00	8.186e-05	-12.02	-25.87; 1.83	0.0890591	7.86922	-2.05; 17.79	0.119999	NA	NA; NA	NA	-13.45	-32.96; 6.06	0.176583	-13.45	-32.96; 6.06	0.176583
	HYP	KORA S4	22.8097	-inf; inf	0.9989	-19.2462	-33730.63; 33692.13	0.999107	2.52831	-23408.18; 23413.23	0.999831	NA	NA; NA	NA	1.17062	-1.61; 3.95	0.409722	1.17062	-1.61; 3.95	0.409722
	SBP	KORA S4	21.81	-1.19; 44.82	0.06376	-18.14	-41.15; 4.87	0.122311	1.835	-14.44; 18.11	0.825056	NA	NA; NA	NA	6.573	-27.63; 40.77	0.706414	6.573	-27.63; 40.77	0.706414
rs1105297	DBP	KORA S4	-2.045	-3.51; -0.58	0.006314	-0.04158	-1.02; 0.94	0.933724	-0.66305	-1.48; 0.15	0.110338	-1.32	-2.61; -0.03	0.04567	0.5374	-0.61; 1.68	0.356724	-0.278501	-1.13; 0.58	0.523582
	HYP	KORA S4	-0.232563	-0.54; 0.09	0.153	-0.120813	-0.35; 0.11	0.303036	-0.159032	-0.35; 0.03	0.0946444	-0.0557241	-0.36; 0.25	0.7158	0.0870947	-0.17; 0.34	0.501566	0.0274305	-0.17; 0.22	0.781487
	SBP	KORA S4	-0.3578	-2.71; 2.00	0.7658	0.2295	-1.4; 1.86	0.782313	0.0392672	-1.3; 1.38	0.95415	-0.5917	-2.82; 1.64	0.6035	2.081	0.1; 4.06	0.0393607	0.903353	-0.58; 2.38	0.231748
rs11195419	DBP	KORA S4, HYPEST	3.448	1.42; 5.47	0.0009162	0.743428	-0.6; 2.08	0.27686	1.56614	0.45; 2.68	0.00602862	1.686	-0.28; 3.65	0.09317	0.423605	-1.00; 1.85	0.559196	0.857642	-0.29; 2.01	0.144364
	HYP	KORA S4, HYPEST	0.414755	-0.02; 0.85	0.06356	0.348925	0.04; 0.65	0.0245396	0.37035	0.12; 0.62	0.00366185	0.396088	-0.05; 0.85	0.08472	-0.0604294	-0.34; 0.22	0.675414	0.068693	-0.17; 0.31	0.574068
	SBP	KORA S4, HYPEST	2.945	-0.32; 6.21	0.07782	0.842537	-1.35; 3.04	0.451602	1.49639	-0.32; 3.32	0.107262	2.248	-1.14; 5.64	0.1939	1.5883	-0.83; 4.01	0.198562	1.81144	-0.16; 3.78	0.0714723
rs2303934	DBP	KORA S4	1.068	-2.79; 4.93	0.5881	-1.891	-4.29; 0.51	0.122973	-1.06552	-3.11; 0.97	0.306062	1.455	-2.43; 5.34	0.4636	-1.466	-4.28; 1.35	0.307979	-0.459992	-2.74; 1.82	0.692791
	HYP	KORA S4	0.655445	-0.06; 1.38	0.07464	-0.127152	-0.71; 0.46	0.669087	0.182569	-0.27; 0.64	0.429837	1.22818	0.31; 2.14	0.008477	-0.215672	-0.83; 0.40	0.492176	0.234517	-0.28; 0.78	0.367962
	SBP	KORA S4	-0.3324	-6.51; 5.85	0.9161	-3.224	-7.23; 0.78	0.114727	-2.36799	-5.73; 0.99	0.167348	7.261	0.57; 13.95	0.03384	-2.897	-7.83; 2.03	0.249367	0.679098	-3.29; 4.65	0.737289
rs3765894	DBP	KORA S4	-0.7902	-2.03; 0.45	0.2119	0.0005472	-0.94; 0.94	0.999091	-0.288987	-1.04; 0.46	0.449993	-0.4006	-1.62; 0.82	0.521	0.6684	-0.45; 1.78	0.240613	0.182265	-0.64; 1.01	0.664761
	HYP	KORA S4	-0.166645	-0.45; 0.1	0.2317	-0.0433251	-0.26; 0.18	0.698112	-0.0915868	-0.26; 0.08	0.293265	-0.351545	-0.65; -0.05	0.02018	0.076961	-0.17; 0.33	0.545469	-0.10065	-0.29; 0.09	0.301471
	SBP	KORA S4	-1.765	-3.76; 0.23	0.08333	-0.02015	-1.59; 1.55	0.97988	-0.686092	-1.92; 0.55	0.274834	-0.2466	-2.36; 1.86	0.8188	0.1181	-1.84; 2.07	0.905763	-0.0504809	-1.48; 1.38	0.944986
rs405884	DBP	KORA S4	-0.433	-2.78; 1.92	0.7179	-0.3217	-1.89; 1.24	0.687148	-0.355954	-1.66; 0.95	0.592245	-2.85	-4.84; -0.86	0.00513	0.7344	-1.03; 2.49	0.413305	-0.842286	-2.16; 0.47	0.209959
	HYP	KORA S4	-0.675111	-1.2; -0.13	0.01512	-0.204076	-0.59; 0.19	0.30488	-0.363634	-0.68; -0.05	0.0245606	-0.708058	-1.24; -0.16	0.0107	0.0889262	-0.30; 0.47	0.650872	-0.177364	-0.49; 0.14	0.268669
	SBP	KORA S4	-2.343	-6.12; 1.43	0.2245	-0.307	-2.91; 2.29	0.817044	-0.96239	-3.10; 1.18	0.378474	-6.801	-10.25; -3.36	0.0001253	0.9137	-2.16; 3.99	0.560334	-2.5068	-4.80; -0.21	0.0322346
NA - not applicable due to low allele frequency
